# Supplementary material for: Behavioral Phenotyping in a Murine Model of GBA1-Associated Parkinson Disease
Source: MDPI journal article supplement (doi:10.3390/ijms22136826), 2021-06-25
Supplement: s1 [file s1]

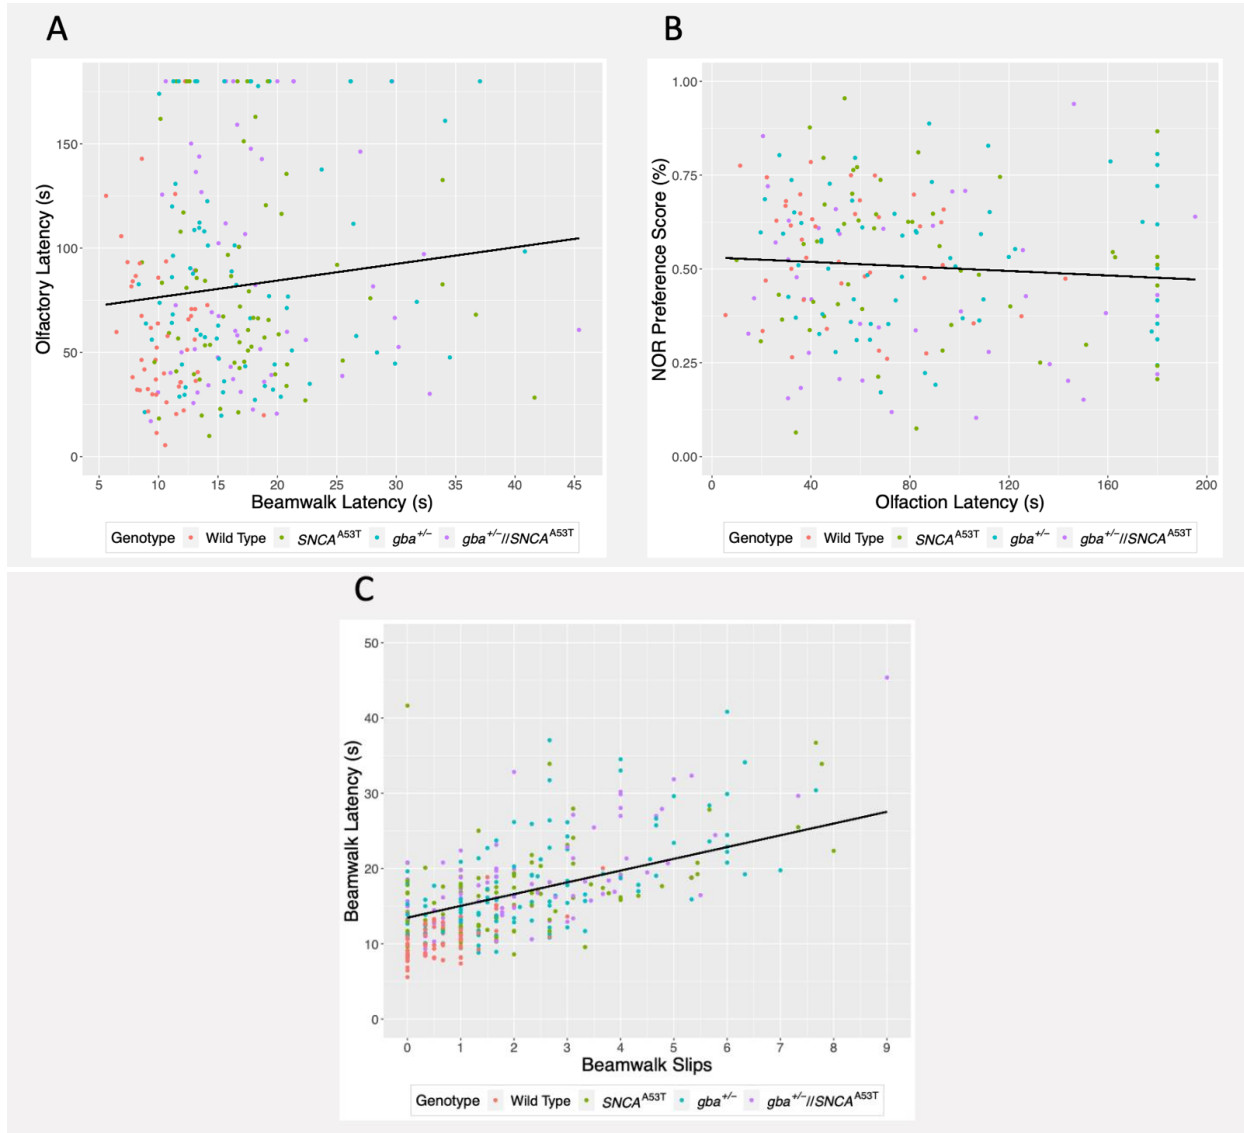

**Figure S1.** Correlation analyses between testing modalities; (A) correlation analysis between preference scores and olfaction latency as determined by the buried pellet test. The black line displays the best-fit line after controlling for repeated measures Figure 0. (B) Correlation analysis between olfaction latency and time taken to cross the beam walk. There was not a significant correlation between these parameters ( $p = 0.099$ ); (C) Correlation between beam walk latency and slip frequency from the beam walk test. The correlation between these parameters was statistically significant ( $p = 0$ ).

**Table S1.** Results of linear mixed model of olfaction data with observations after month 19 removed. P-values comparing both the intercept (9-month baseline score) and slope values between genotypes are provided. For all tests except the novel object recognition test, a more positive slope value indicates worsening performance over time.

| Test          | Genotype                                                | Baseline Value (8 months) | Slope      | p-val vs. Wild Type (Baseline) | p-val vs. Wild Type (Slope) | p-val vs. <i>gba</i> <sup>+/-</sup> (Baseline) | p-val vs. <i>gba</i> <sup>+/-</sup> (Slope) | p-val vs. <i>SNCA</i> <sup>A53T</sup> (Baseline) | p-val vs. <i>SNCA</i> <sup>A53T</sup> (Slope) |
|---------------|---------------------------------------------------------|---------------------------|------------|--------------------------------|-----------------------------|------------------------------------------------|---------------------------------------------|--------------------------------------------------|-----------------------------------------------|
| Buried Pellet | Wild Type                                               | 66.5±13.4                 | -0.98±1.85 | ~                              | ~                           | ~                                              | ~                                           | ~                                                | ~                                             |
|               | <i>gba</i> <sup>+/-</sup>                               | 73.9±11.0                 | 2.04±1.52  | 0.444                          | 0.209                       | ~                                              | ~                                           | ~                                                | ~                                             |
|               | <i>SNCA</i> <sup>A53T</sup>                             | 56.3±10.7                 | 3.31±1.63  | 0.808                          | 0.084                       | ~                                              | ~                                           | ~                                                | ~                                             |
|               | <i>gba</i> <sup>+/-</sup> / <i>SNCA</i> <sup>A53T</sup> | 56.3±11.8                 | 4.69±1.76  | 0.815                          | <b>0.028</b>                | 0.283                                          | 0.257                                       | 0.999                                            | 0.567                                         |

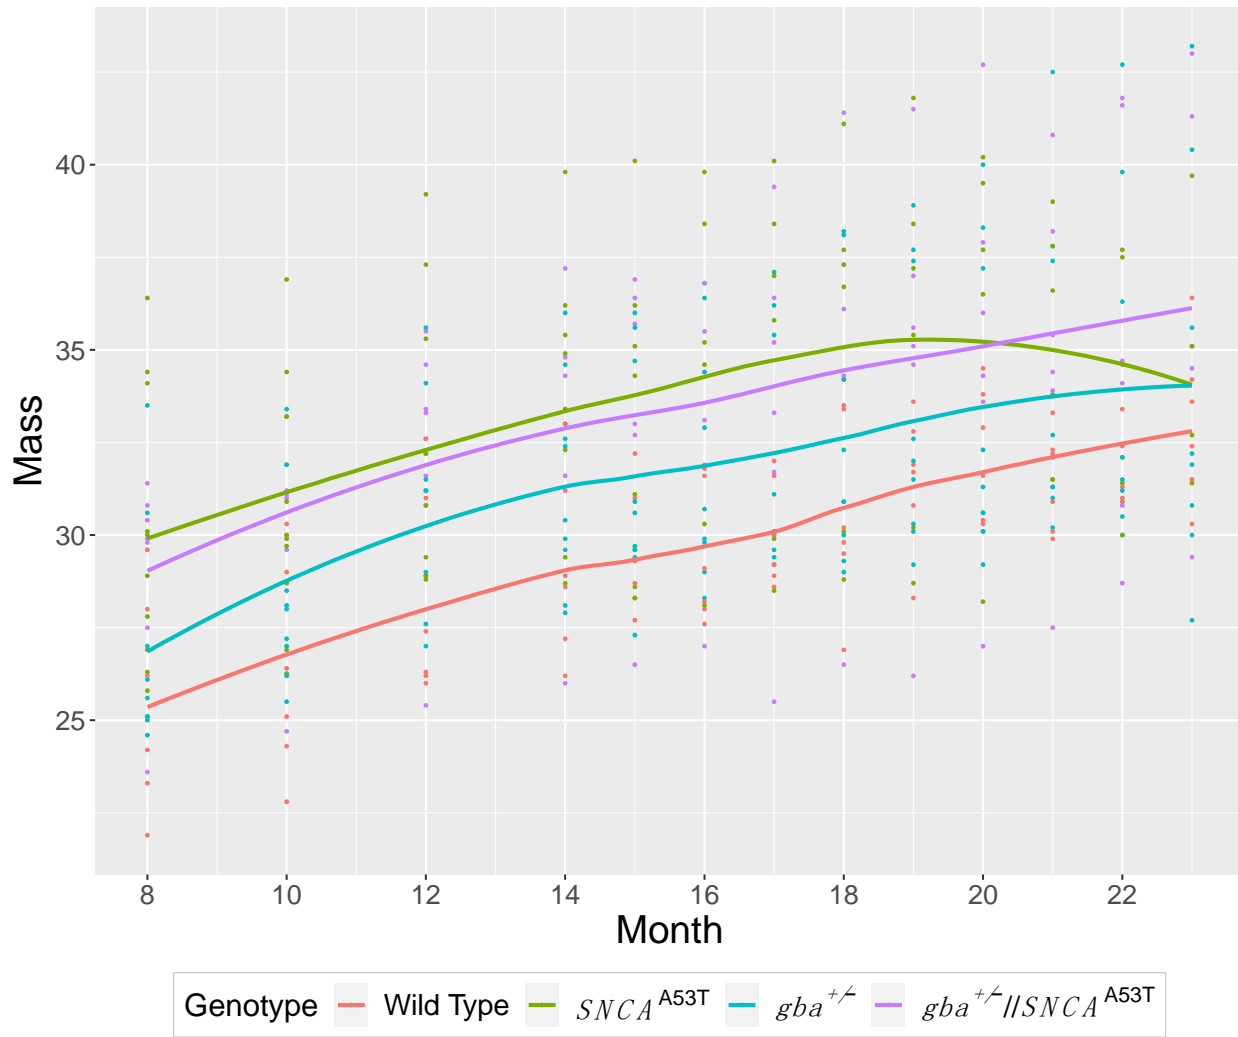

**Figure S2.** Mouse mass over time. Trend lines were calculated via LOESS regression. Colored fill represents standard error. Colored points represent individual observations, coded by genotype.
